# Supplementary material for: The Impact of Electric Bidet Diffusion on Municipal Water Infrastructure
Source: MDPI journal article supplement (doi:10.3390/w14040639), 2022-02-18
Supplement: s1 [file s1]

Archive with 1 entries (1 files):
- water-1533274-supplementary.pdf
