# Supplementary material for: The Impact of Electric Bidet Diffusion on Municipal Water Infrastructure
Source: MDPI journal article supplement (doi:10.3390/w14040639), 2022-02-18
Supplement: s1 [file s1 › water-1533274-supplementary.pdf]

**Table S1.** Toilet Use Survey at Home and Away from Home.

| A. Attributes (Please tell us about yourself.) |                                                                                                                                                                                                                                                                                                                                                                                                                                        |              |                                                             |
|------------------------------------------------|----------------------------------------------------------------------------------------------------------------------------------------------------------------------------------------------------------------------------------------------------------------------------------------------------------------------------------------------------------------------------------------------------------------------------------------|--------------|-------------------------------------------------------------|
| No                                             | Question                                                                                                                                                                                                                                                                                                                                                                                                                               | Alternatives |                                                             |
| A-1                                            | Please indicate your gender.                                                                                                                                                                                                                                                                                                                                                                                                           | 1            | Men                                                         |
|                                                |                                                                                                                                                                                                                                                                                                                                                                                                                                        | 2            | Women                                                       |
| A-2                                            | Please indicate your age.                                                                                                                                                                                                                                                                                                                                                                                                              | 1            | Teenagers                                                   |
|                                                |                                                                                                                                                                                                                                                                                                                                                                                                                                        | 2            | 20s                                                         |
|                                                |                                                                                                                                                                                                                                                                                                                                                                                                                                        | 3            | 30s                                                         |
|                                                |                                                                                                                                                                                                                                                                                                                                                                                                                                        | 4            | 40s                                                         |
|                                                |                                                                                                                                                                                                                                                                                                                                                                                                                                        | 5            | 50s                                                         |
|                                                |                                                                                                                                                                                                                                                                                                                                                                                                                                        | 6            | 60s                                                         |
| A-3                                            | Please indicate your place of residence.<br>If you chose "Other," please indicate the prefecture in which you live.                                                                                                                                                                                                                                                                                                                    | 1            | Fukuoka prefecture                                          |
|                                                |                                                                                                                                                                                                                                                                                                                                                                                                                                        | 2            | Other( )                                                    |
| A-4                                            | How many family members are living with you in your current residence?<br>Please select one that applies to you.                                                                                                                                                                                                                                                                                                                       | 1            | 0                                                           |
|                                                |                                                                                                                                                                                                                                                                                                                                                                                                                                        | 2            | 1                                                           |
|                                                |                                                                                                                                                                                                                                                                                                                                                                                                                                        | 3            | More than 2 people                                          |
| A-5                                            | Do you have a hot-water toilet seat installed in your home?<br>Please select one that applies to you.                                                                                                                                                                                                                                                                                                                                  | 1            | Installed                                                   |
|                                                |                                                                                                                                                                                                                                                                                                                                                                                                                                        | 2            | No installation                                             |
| A-6                                            | <p>Please write down the part number of the toilet seat (there is often a sticker on the back of the seat).</p> <p>Example: TCF954 #NW1 (in the case of the photo below, made by TOTO)</p> <div style="display: flex; justify-content: space-around;"> 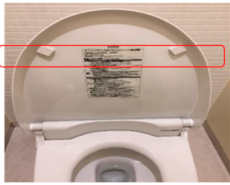 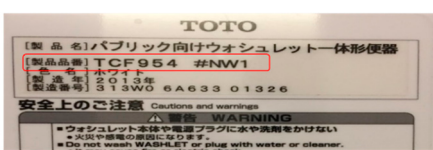 </div> |              | <p>Part Number<br/>( )</p> <p>Manufacturer name<br/>( )</p> |

| B. How do you use the toilet in your home? Please tell us about the following. |                                                                                                                                                                                      |                                    |                                                                                                                   |
|--------------------------------------------------------------------------------|--------------------------------------------------------------------------------------------------------------------------------------------------------------------------------------|------------------------------------|-------------------------------------------------------------------------------------------------------------------|
| No                                                                             | Question                                                                                                                                                                             | Alternatives                       |                                                                                                                   |
| B-1                                                                            | Do you use the electric bidet at home?<br>Please select one that applies to you."                                                                                                    | 1                                  | Use                                                                                                               |
|                                                                                |                                                                                                                                                                                      | 2                                  | Do not use                                                                                                        |
| B-2                                                                            | If you selected "2. Do not use" in B-1, please answer.<br>Please select one reason why you do not use the electric bidet.                                                            | 1                                  | Worried about hygiene                                                                                             |
|                                                                                |                                                                                                                                                                                      | 2                                  | Worried about the startup noise                                                                                   |
|                                                                                |                                                                                                                                                                                      | 3                                  | Not enough time                                                                                                   |
|                                                                                |                                                                                                                                                                                      | 4                                  | I don't need it                                                                                                   |
|                                                                                |                                                                                                                                                                                      | 5                                  | Paper is wasted                                                                                                   |
|                                                                                |                                                                                                                                                                                      | 6                                  | Other ( )                                                                                                         |
| B-3                                                                            | Ask about the problems you have with the toilet in your home.<br>Please select up to three things that you are dissatisfied with when using the toilet at home (excluding cleaning). | Please answer up to the top three. |                                                                                                                   |
|                                                                                | 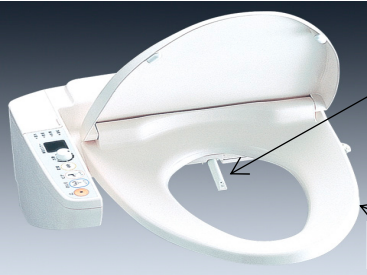                                                                                                  | 1                                  | Remnants of other people's odor before using the restroom and remnants of your own odor after using the restroom. |
|                                                                                |                                                                                                                                                                                      | 2                                  | Odor from other toilets (e.g., odor smeared on walls or floor).                                                   |
|                                                                                |                                                                                                                                                                                      | 3                                  | Stains on areas where skin or clothes may come in contact with (toilet seat, etc.).                               |
|                                                                                |                                                                                                                                                                                      | 4                                  | Stains in areas that are easily visible.                                                                          |
|                                                                                |                                                                                                                                                                                      | 5                                  | Stains in areas that are difficult to clean on a daily basis (holes, crevices, backside, etc.).                   |
|                                                                                |                                                                                                                                                                                      |                                    | Stains on the nozzle.                                                                                             |
|                                                                                |                                                                                                                                                                                      | 6                                  | Stains around toilet bowl (floor, wall, etc.).                                                                    |
|                                                                                |                                                                                                                                                                                      | 7                                  | Dirt adhering to the toilet bowl may not flow down.                                                               |
|                                                                                |                                                                                                                                                                                      | 8                                  | Dirt on the toilet bowl does not flow down or sometimes clogs up.                                                 |
|                                                                                |                                                                                                                                                                                      | 9                                  | Water or waste water splashes during urination or defecation.                                                     |
|                                                                                |                                                                                                                                                                                      | 10                                 | Loud noise when using the toilet (flushing sound, etc.).                                                          |
|                                                                                |                                                                                                                                                                                      | 11                                 | The temperature of the toilet seat is too low or too high.                                                        |
|                                                                                |                                                                                                                                                                                      | 12                                 | It is difficult to understand how to operate the remote control.                                                  |

|     |                                                                                                                                                                                                                                                                                                                                                                                                             |    |                                                                     |
|-----|-------------------------------------------------------------------------------------------------------------------------------------------------------------------------------------------------------------------------------------------------------------------------------------------------------------------------------------------------------------------------------------------------------------|----|---------------------------------------------------------------------|
|     |                                                                                                                                                                                                                                                                                                                                                                                                             | 13 | No particular complaints.                                           |
|     |                                                                                                                                                                                                                                                                                                                                                                                                             | 14 | Other( )                                                            |
|     |                                                                                                                                                                                                                                                                                                                                                                                                             | 15 |                                                                     |
| B-4 | When you use the toilet at home, do you ever worry about cleanliness when you sit on the toilet seat?<br>Please select one that applies to you.                                                                                                                                                                                                                                                             | 1  | Just sit there                                                      |
|     |                                                                                                                                                                                                                                                                                                                                                                                                             | 2  | Wipe with paper                                                     |
|     |                                                                                                                                                                                                                                                                                                                                                                                                             | 3  | Wipe with a sterilizing sheet                                       |
|     |                                                                                                                                                                                                                                                                                                                                                                                                             | 4  | Put down the paper                                                  |
|     |                                                                                                                                                                                                                                                                                                                                                                                                             | 5  | Posture without touching                                            |
|     |                                                                                                                                                                                                                                                                                                                                                                                                             | 6  | Other( )                                                            |
| B-5 | How often do you clean the toilet in your home? (Excluding the frequency of cleaning by family members other than you)<br>Please select one that applies to you.                                                                                                                                                                                                                                            | 1  | Everyday                                                            |
|     |                                                                                                                                                                                                                                                                                                                                                                                                             | 2  | About 4 to 6 times a week                                           |
|     |                                                                                                                                                                                                                                                                                                                                                                                                             | 3  | 2 to 3 times a week                                                 |
|     |                                                                                                                                                                                                                                                                                                                                                                                                             | 4  | About once a week                                                   |
|     |                                                                                                                                                                                                                                                                                                                                                                                                             | 5  | About 2 to 3 times a month                                          |
|     |                                                                                                                                                                                                                                                                                                                                                                                                             | 6  | About once a month                                                  |
|     |                                                                                                                                                                                                                                                                                                                                                                                                             | 7  | About 3 to 5 times in 6 months                                      |
|     |                                                                                                                                                                                                                                                                                                                                                                                                             | 8  | Less than that                                                      |
|     |                                                                                                                                                                                                                                                                                                                                                                                                             | 9  | I don't clean it by myself                                          |
| B-6 | Please answer only if you answered that you sometimes clean the toilet at home by yourself in B-3 (if you selected 1, 2, 3, 4, 5, 6, 7 or 8).<br>If you don't want to clean by yourself (if you selected 9), please go to B-8.<br>Ask about the problems you have with the toilet in your home.<br>Please select up to three things that you are dissatisfied with "when cleaning" the toilet in your home. |    | Please answer up to the top three.                                  |
|     |                                                                                                                                                                                                                                                                                                                                                                                                             | 1  | Some stains are difficult or impossible to remove                   |
|     |                                                                                                                                                                                                                                                                                                                                                                                                             | 2  | There are parts that are difficult to clean (time consuming)        |
|     |                                                                                                                                                                                                                                                                                                                                                                                                             | 3  | There are parts that cannot be cleaned in the first place           |
|     |                                                                                                                                                                                                                                                                                                                                                                                                             | 4  | I don't know how to clean some parts                                |
|     |                                                                                                                                                                                                                                                                                                                                                                                                             | 5  | Frequent cleaning is required (toilet gets dirty quickly)           |
|     |                                                                                                                                                                                                                                                                                                                                                                                                             | 6  | I don't have or don't want to have space to store my cleaning tools |
|     |                                                                                                                                                                                                                                                                                                                                                                                                             | 7  | I don't have the right cleaning tools                               |
|     |                                                                                                                                                                                                                                                                                                                                                                                                             | 8  | Scratches or discoloration from cleaning                            |

|     |                                                                                                                                                                                                   |    |                                                                                                           |
|-----|---------------------------------------------------------------------------------------------------------------------------------------------------------------------------------------------------|----|-----------------------------------------------------------------------------------------------------------|
|     |                                                                                                                                                                                                   | 9  | Replenishing consumables (disinfectant sheets, detergent, etc.) is troublesome                            |
|     |                                                                                                                                                                                                   | 10 | I don't want to use consumables (disinfectant sheets, detergent, etc.)                                    |
|     |                                                                                                                                                                                                   | 11 | I don't want to see how dirty it is when I clean it                                                       |
|     |                                                                                                                                                                                                   | 12 | I don't want to smell it when cleaning                                                                    |
|     |                                                                                                                                                                                                   | 13 | Work space is too small                                                                                   |
|     |                                                                                                                                                                                                   | 14 | No particular complaints.                                                                                 |
|     |                                                                                                                                                                                                   | 15 | Other( )                                                                                                  |
| B-7 | <p>To what extent do you regularly clean the toilet in your home?</p> <p>Please select one that applies to you.</p> <p>(Please choose one that applies to you, excluding elaborate cleaning.)</p> | 1  | Areas that are easily visible and easy to wash (toilet bowl surface, front and back of toilet seat, etc.) |
|     |                                                                                                                                                                                                   | 2  | Areas that are difficult to see and require one action such as removal, withdrawal, etc. (nozzles, etc.)  |
|     |                                                                                                                                                                                                   | 3  | Areas requiring special cleaning tools (e.g. gaps in toilet seat)                                         |
|     |                                                                                                                                                                                                   | 4  | Areas requiring disassembly (e.g., inside of toilet bowl tank)                                            |
|     |                                                                                                                                                                                                   | 5  | Do not know                                                                                               |

| C. How often do you use the bathroom when you go out? |                                                                                                                                                 |                                                                                                                                                                    |
|-------------------------------------------------------|-------------------------------------------------------------------------------------------------------------------------------------------------|--------------------------------------------------------------------------------------------------------------------------------------------------------------------|
| No                                                    | Question                                                                                                                                        | Alternatives                                                                                                                                                       |
| C-1                                                   | When using the toilet on the go, do you ever worry about cleanliness when you sit on the toilet seat?<br>Please select one that applies to you. | 1 Just sit there<br>2 Wipe with paper<br>3 Wipe with a sterilizing sheet<br>4 Put down the paper<br>5 Posture without touching<br>6 Other( )                       |
| C-2                                                   | Do you want to use the electric bidet when you are away from home?<br>Please select one that applies to you.                                    | 1 Use<br>2 Do not use                                                                                                                                              |
| C-3                                                   | Questions for those who selected "2 Don't use" in C-3.<br>Please tell us why you do not use the electric bidet when you are away from home.     | 1 Not in regular use<br>2 Worried about hygiene<br>3 Worried about the startup noise<br>4 Not enough time<br>5 I don't need it<br>6 Paper is wasted<br>7 Other ( ) |

| D. How often do you use the electric bidet? |                                                                                                                                                                                                     |                                                                                                                                                                                                                                                                                                                                                                                                         |
|---------------------------------------------|-----------------------------------------------------------------------------------------------------------------------------------------------------------------------------------------------------|---------------------------------------------------------------------------------------------------------------------------------------------------------------------------------------------------------------------------------------------------------------------------------------------------------------------------------------------------------------------------------------------------------|
| No                                          | Question                                                                                                                                                                                            | Alternatives                                                                                                                                                                                                                                                                                                                                                                                            |
| D-1                                         | Please select all that apply to how often you use the electric bidet when using the toilet at home.                                                                                                 | <div>1 Use every time you defecate or urinate</div> <div>2 Use only when defecating, every time</div> <div>3 Use only when urinating, every time</div> <div>4 Use during urination ( ) % of the time</div> <div>5 (Female only) Use every time when menstruating</div> <div>6 (Female only) Use during menstruation ( ) % of the time</div> <div>7 Do not use</div> <div>8 Other ( )</div> <div>9</div> |
| D-2                                         | Please select all that apply to the frequency of using the electric bidet when using the toilet outside the home.<br>(If the toilet has the electric bidet , please indicate how often you use it.) | <div>1 Use every time you defecate or urinate</div> <div>2 Use only when defecating, every time</div> <div>3 Use only when urinating, every time</div> <div>4 Use during urination ( ) % of the time</div> <div>5 (Female only) Use every time when menstruating</div> <div>6 (Female only) Use during menstruation ( ) % of the time</div> <div>7 Do not use</div> <div>8 Other ( )</div> <div>9</div> |
